# Supplementary material for: Randomised controlled trial of early magnetically controlled capsule endoscopy for the prevention of gastrointestinal bleeding in patients at high bleeding risk scheduled for percutaneous coronary intervention: MACE-GPS study protocol
Source: HighWire-hosted journal article supplement (doi:10.1136/bmjopen-2023-077852), 2024-01-01
Supplement: bmjopen-2023-077852supp001_data_supplement.pdf [file bmjopen-2023-077852supp001_data_supplement.pdf]

**Supplemental Materials Table S1. MACE-GPS participating investigators**

| List of participating centres                                                    |
|----------------------------------------------------------------------------------|
| Fu Wai Hospital, Chinese Academy of Medical Sciences                             |
| The Second Hospital of Dalian Medical University                                 |
| Changhai Hospital, Naval Medical University                                      |
| Peking University Third Hospital                                                 |
| Ningxia Medical University General Hospital                                      |
| People's Liberation Army Peace Hospital                                          |
| Xijing Hospital, Air Force Medical University                                    |
| Xiangya Second Hospital, Central South University                                |
| General Hospital of Tianjin Medical University                                   |
| The First Affiliated Hospital of Harbin Medical University                       |
| Seventh Medical Centre, General Hospital of the Chinese People's Liberation Army |
| The First Affiliated Hospital of Xinjiang Medical University                     |
| Beijing Anzhen Hospital, Capital Medical University                              |
| First Medical Centre, General Hospital of the Chinese People's Liberation Army   |
| Peking Union Medical College Hospital, Chinese Academy of Medical Sciences       |
| Peking University First Hospital                                                 |
| West China Hospital, Sichuan University                                          |
| Huazhong Fuwai Hospital                                                          |

Run Run Shaw Hospital, Zhejiang University

Beijing Friendship Hospital, Capital Medical University

Shandong First Medical University Shandong Provincial Hospital

Peking University People's Hospital

---
