# Supplementary material for: Randomised controlled trial of early magnetically controlled capsule endoscopy for the prevention of gastrointestinal bleeding in patients at high bleeding risk scheduled for percutaneous coronary intervention: MACE-GPS study protocol
Source: HighWire-hosted journal article supplement (doi:10.1136/bmjopen-2023-077852), 2024-01-01
Supplement: bmjopen-2023-077852supp002_data_supplement.pdf [file bmjopen-2023-077852supp002_data_supplement.pdf]

Supplementary Material Table S2

SPIRIT Item2b: WHO Trial Registration Data Set

|                    |                                                                                                                                                                                                                                                                                 |
|--------------------|---------------------------------------------------------------------------------------------------------------------------------------------------------------------------------------------------------------------------------------------------------------------------------|
| Trial ID           | ChiCTR2300070025                                                                                                                                                                                                                                                                |
| Public title       | A randomized controlled trial comparing the efficacy of magnetically controlled capsule endoscopy with conventional treatment in high bleeding risk Patients Undergoing Percutaneous Coronary Interventions for the Prevention of Gastrointestinal Bleeding: The MACE-GPS Study |
| Scientific title   | A randomized controlled trial comparing the efficacy of magnetically controlled capsule endoscopy with conventional treatment in high bleeding risk Patients Undergoing Percutaneous Coronary Interventions for the Prevention of Gastrointestinal Bleeding: The MACE-GPS Study |
| Acronym            |                                                                                                                                                                                                                                                                                 |
| Primary sponsor    | Fu Wai Hospital, Chinese Academy of Medical Sciences                                                                                                                                                                                                                            |
| Date registration  | 31/03/2023                                                                                                                                                                                                                                                                      |
| Date registration3 | 20230331                                                                                                                                                                                                                                                                        |
| Export date        | 11/06/2023 01:28:58                                                                                                                                                                                                                                                             |
| Source Register    | ChiCTR                                                                                                                                                                                                                                                                          |
| web address        | <a href="https://www.chictr.org.cn/showproj.html?proj=193948">https://www.chictr.org.cn/showproj.html?proj=193948</a>                                                                                                                                                           |
| Recruitment Status | Not Recruiting                                                                                                                                                                                                                                                                  |
| other records      | No                                                                                                                                                                                                                                                                              |
| Inclusion agemin   | 18                                                                                                                                                                                                                                                                              |
| Inclusion agemax   | -                                                                                                                                                                                                                                                                               |

|                     |                                                                                                                                                                                                                                                                                                                                                                                                                                                                                                                                              |
|---------------------|----------------------------------------------------------------------------------------------------------------------------------------------------------------------------------------------------------------------------------------------------------------------------------------------------------------------------------------------------------------------------------------------------------------------------------------------------------------------------------------------------------------------------------------------|
| Inclusion gender    | Both                                                                                                                                                                                                                                                                                                                                                                                                                                                                                                                                         |
| Date enrollement    | 01/04/2023                                                                                                                                                                                                                                                                                                                                                                                                                                                                                                                                   |
| Target size         | Capsule gastroscope group:1228<br>Routine treatment group:1228                                                                                                                                                                                                                                                                                                                                                                                                                                                                               |
| Study type          | Interventional study                                                                                                                                                                                                                                                                                                                                                                                                                                                                                                                         |
| Study design        | Parallel                                                                                                                                                                                                                                                                                                                                                                                                                                                                                                                                     |
| Phase               | N/A                                                                                                                                                                                                                                                                                                                                                                                                                                                                                                                                          |
| Countries           | China                                                                                                                                                                                                                                                                                                                                                                                                                                                                                                                                        |
| Contact Firstname   | Yongjian Wu                                                                                                                                                                                                                                                                                                                                                                                                                                                                                                                                  |
| Contact Lastname    |                                                                                                                                                                                                                                                                                                                                                                                                                                                                                                                                              |
| Contact Address     | 167 Bei Lishi Road, Xicheng District, Beijing, China                                                                                                                                                                                                                                                                                                                                                                                                                                                                                         |
| Contact Email       | wuyongjian@fuwaihospital.org                                                                                                                                                                                                                                                                                                                                                                                                                                                                                                                 |
| Contact Tel         | 13701387189                                                                                                                                                                                                                                                                                                                                                                                                                                                                                                                                  |
| Contact Affiliation | Fu Wai Hospital, Chinese Academy of Medical Sciences                                                                                                                                                                                                                                                                                                                                                                                                                                                                                         |
| Inclusion Criteria  | <p>Inclusion criteria: Eligible patients were at least 18 years old, undergoing cardiac catheterization ± PCI for either chronic coronary syndrome or acute coronary syndrome with negative cardiac biomarkers (with a positive exercise electrocardiography or at least one severe (= 70%) coronary artery stenosis diagnosed by invasive coronary angiography or coronary artery CT angiography).</p> <p>In addition to meeting the main inclusion criteria, Subjects had to fulfill at least one of the following inclusion criteria:</p> |

|                    |                                                                                                                                                                                                                                                                                                                                                                                                                                                                                                                                                                                                                                                                                                                                                                                                             |
|--------------------|-------------------------------------------------------------------------------------------------------------------------------------------------------------------------------------------------------------------------------------------------------------------------------------------------------------------------------------------------------------------------------------------------------------------------------------------------------------------------------------------------------------------------------------------------------------------------------------------------------------------------------------------------------------------------------------------------------------------------------------------------------------------------------------------------------------|
|                    | <div><div>1) Age ≥ 75 years;</div><div>2) Previous history of peptic ulcer;</div><div>3) Previous history of gastrointestinal bleeding;</div><div>4) Hemoglobin &lt;11 g/dL;</div><div>5) Moderate, Severe or end-stage CKD, eGFR &lt;60 mL/min/1.73m<sup>2</sup>;</div><div>6) Anticipated use of long-term oral anticoagulation;</div><div>7) Liver cirrhosis with portal hypertension;</div><div>8) Active malignancy (excluding nonmelanoma skin cancer) within the past 12 month.</div></div>                                                                                                                                                                                                                                                                                                          |
| Exclusion Criteria | <div><div>Exclusion criteria:</div><div>1. Patients need emergency percutaneous coronary intervention;</div><div>2. Patients with cardiogenic shock;</div><div>3. Patients with previous gastrointestinal or colonic surgery;</div><div>4. Coronary angiography confirmed coronary lesions not suitable for general percutaneous intervention;</div><div>5. Patients with left ventricular ejection fraction (LVEF) ≤ 35%;</div><div>6. Malignant tumours of the colon and rectum;</div><div>7. Platelet count &lt;100 × 10<sup>9</sup>/L;</div><div>8. Severe haematological disorders;</div><div>9. Cerebral hemorrhage or subarachnoid hemorrhage;</div><div>10. History of bowel obstruction, bowel diverticulum;</div><div>11. Patients with pacemakers, cochlear implants, insulin pumps.</div></div> |

|                            |                                                                                                                                |
|----------------------------|--------------------------------------------------------------------------------------------------------------------------------|
| Condition                  | Cardiovascular disease                                                                                                         |
| Intervention               | Capsule gastroscope group: Magnetically controlled capsule gastroscopy;<br><br>Routine treatment group: Routine PCI treatment. |
| Primary outcome            | Gastrointestinal bleeding                                                                                                      |
| Secondary outcome          | Major adverse cardiovascular events                                                                                            |
| results date posted        |                                                                                                                                |
| results date completed     |                                                                                                                                |
| results url link           |                                                                                                                                |
| Retrospective flag         | Yes                                                                                                                            |
| Bridging flag<br>truefalse | FALSE                                                                                                                          |
| Bridged type               |                                                                                                                                |
| results yes no             |                                                                                                                                |
